# Supplementary material
Source: PubMed Central journal article supplement (PMC2291433)
Supplement: mbc_E07-07-0718_1.pdf [file mbc_E07-07-0718_1.pdf]

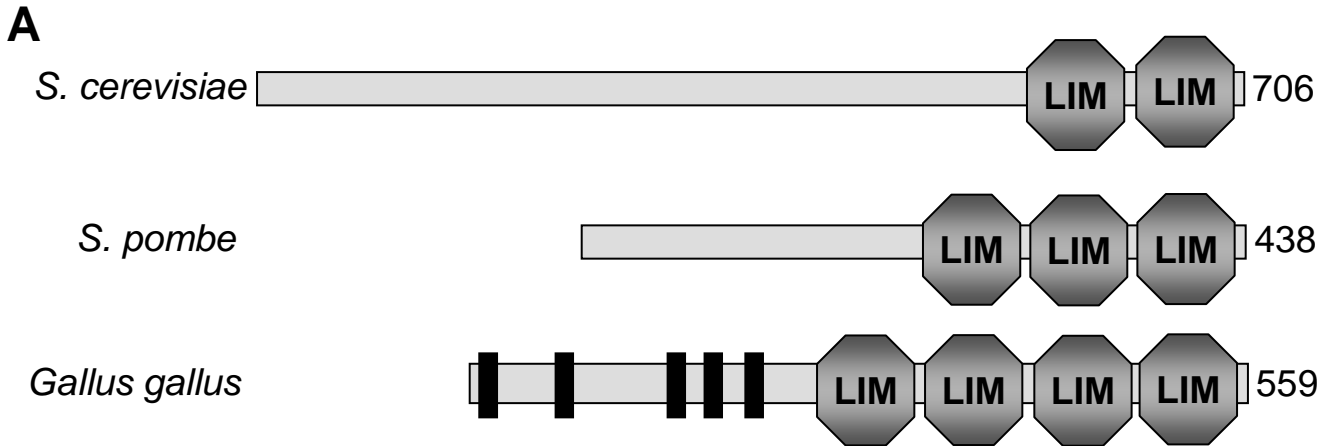

**B** LIM consensus: CXXCX16–23HXXCXXCXXCX16–21CX2–3(C, H, or D).

|               |     |      |                  |             |     |     |      |                |             |      |     |
|---------------|-----|------|------------------|-------------|-----|-----|------|----------------|-------------|------|-----|
| Paxillin Lim1 | 326 | CGAC | CKKPI-AGQVVT---- | AMGKTW      | HPE | HFV | CTHC | QEEIG-SRNFFERD | GQ-PY       | CEKD | 376 |
| Paxillin Lim2 | 385 | CYY  | CNGPI-LDKVVT---- | ALDRTW      | HPE | HFF | CAQC | GVVFFG-PEGFHEK | DGK-AY      | CRKD | 435 |
| Paxillin Lim3 | 444 | CGG  | CARAI-LENYIS---- | ALNTLW      | HPE | CFV | CRE  | CFTPFI-NGSFFE  | HDGQ-PY     | CEVH | 494 |
| Paxillin Lim4 | 503 | CSG  | CQKPI-TGRCIT---- | AMGKKF      | HPE | HFV | CAF  | CLKQLN-KGTFKE  | QNDK-PY     | CQNC | 553 |
| SpPx11 Lim1   | 258 | CHS  | CGGSLRAGRIIS---- | ASGKKL      | HPQ | CFK | CDT  | CSQNLE-HVGFYY  | REGK-FY     | CHLD | 309 |
| SpPx11 Lim2   | 318 | CKH  | CKTPI-EDQAVH---- | INNDWF      | HEN | HHF | CAG  | CSEVFNVNIP     | CIYRDDL-YW  | CQTC | 369 |
| SpPx11 Lim3   | 378 | CKK  | CRKPI-LGISVK---- | GSDGEY      | HSQ | CWT | CGA  | CNALLG-DEGYFM  | IENT-PI     | CRPC | 428 |
| ScPx11 Lim1   | 556 | CRAC | GLEVTGKRMF       | SKKENELSGQW | HRE | CFK | CIE  | CGUKFNKHV      | PCYILGDE-PY | CQKH | 612 |
| ScPx11 Lim2   | 621 | CKV  | CSNFI-EGECLE---  | NDKVERF     | HVD | CLN | CFL  | CKTAIT--NDYYIF | NGEIPL      | CGNH | 672 |
|               |     | *    | *                | :           | .   | .   | .    | .              | .           | .    | *   |

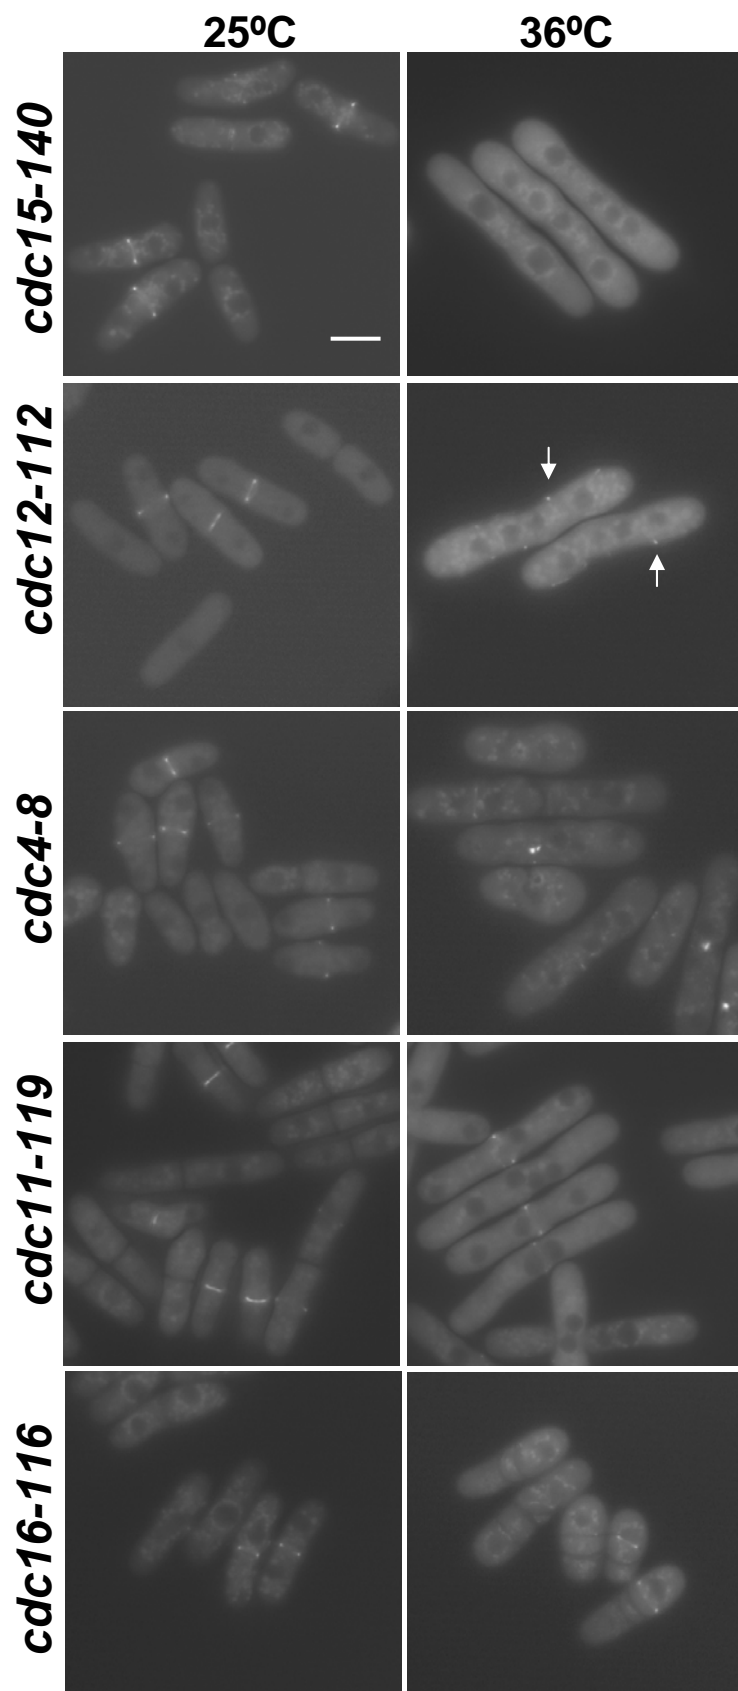

Supplementary Figure 2

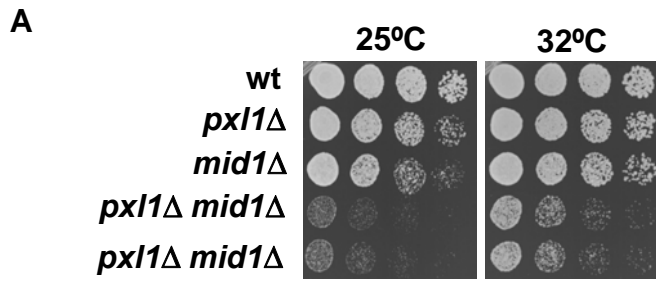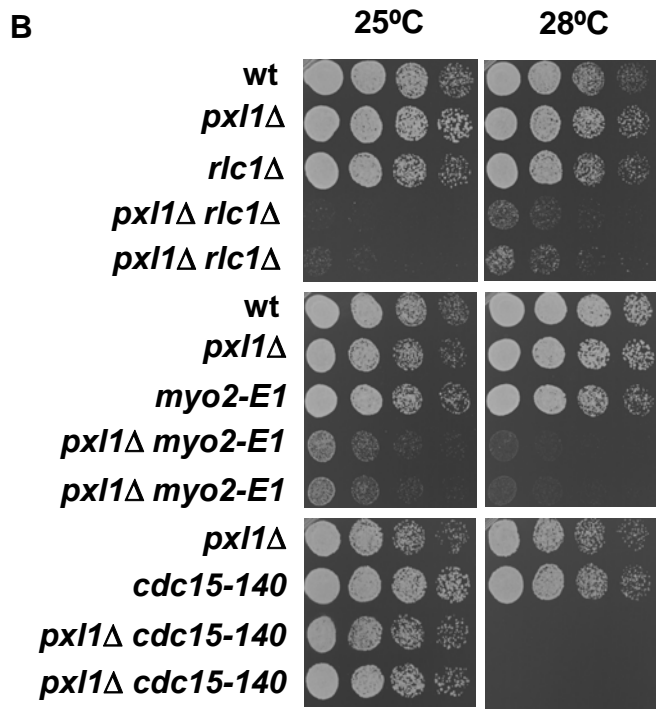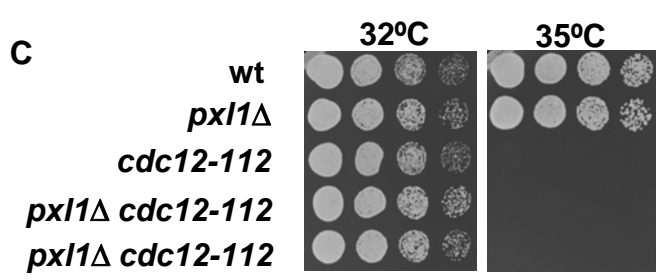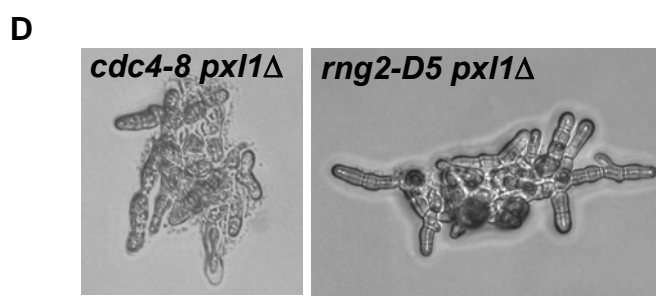

Supplementary Figure 3

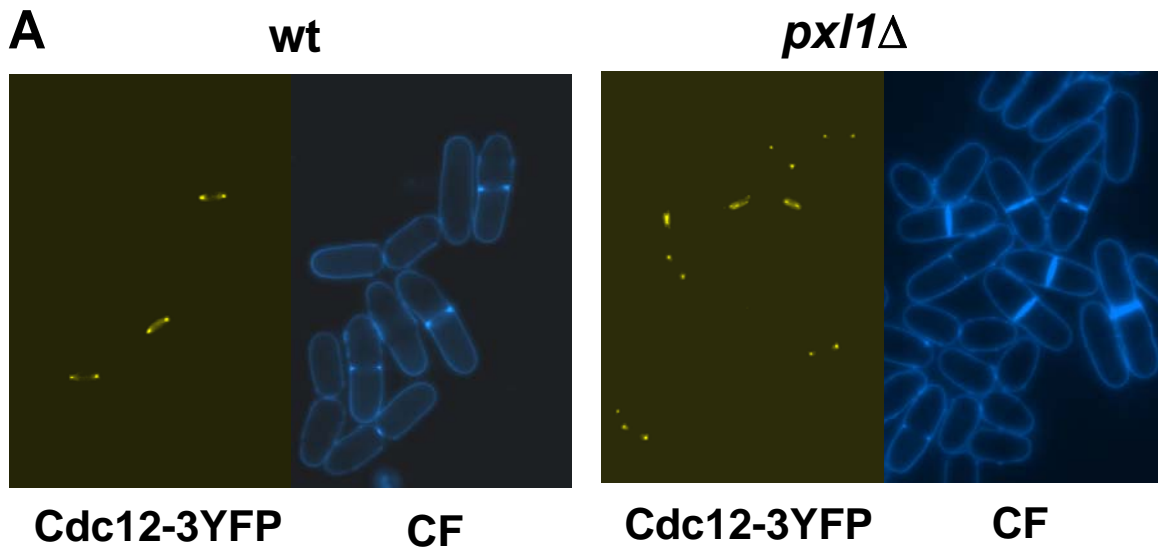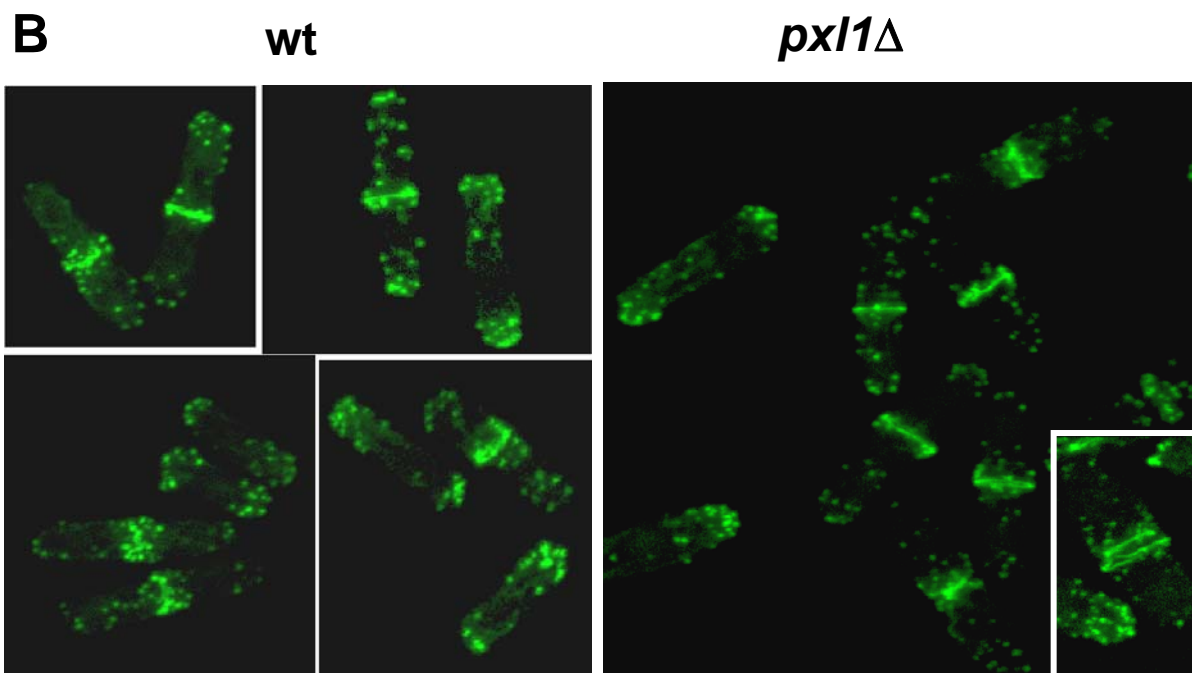

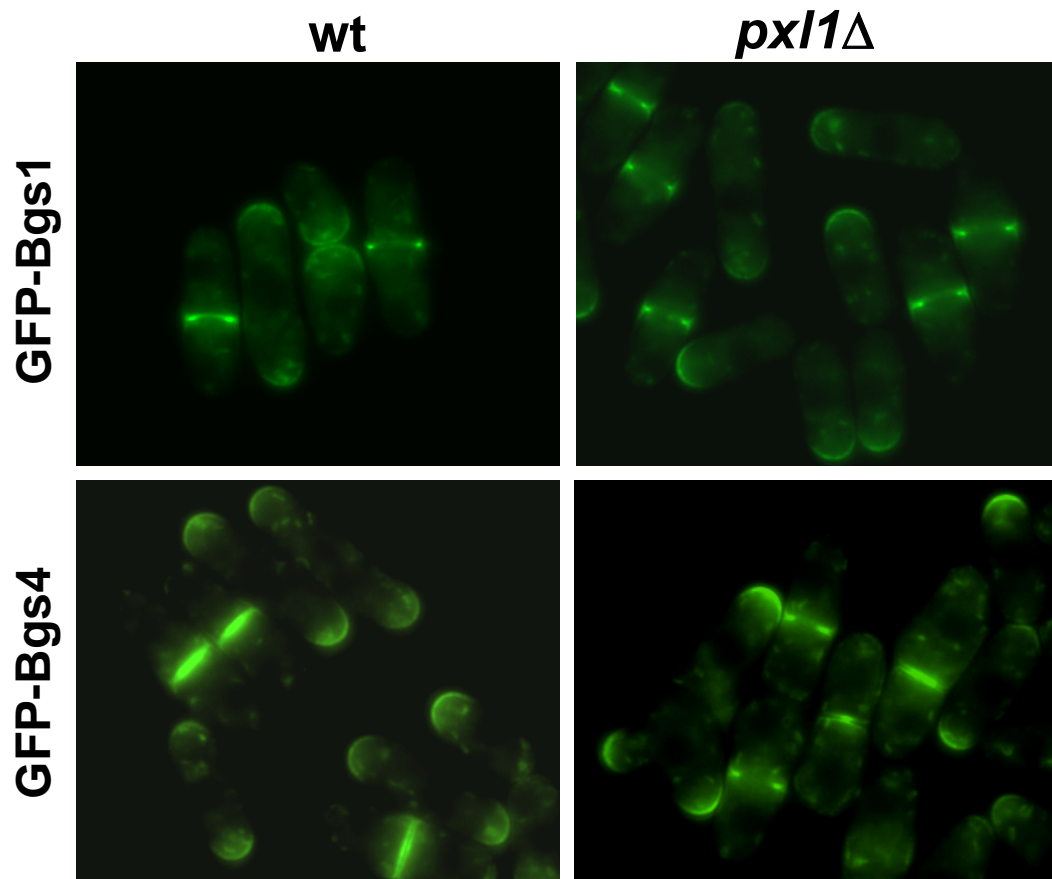

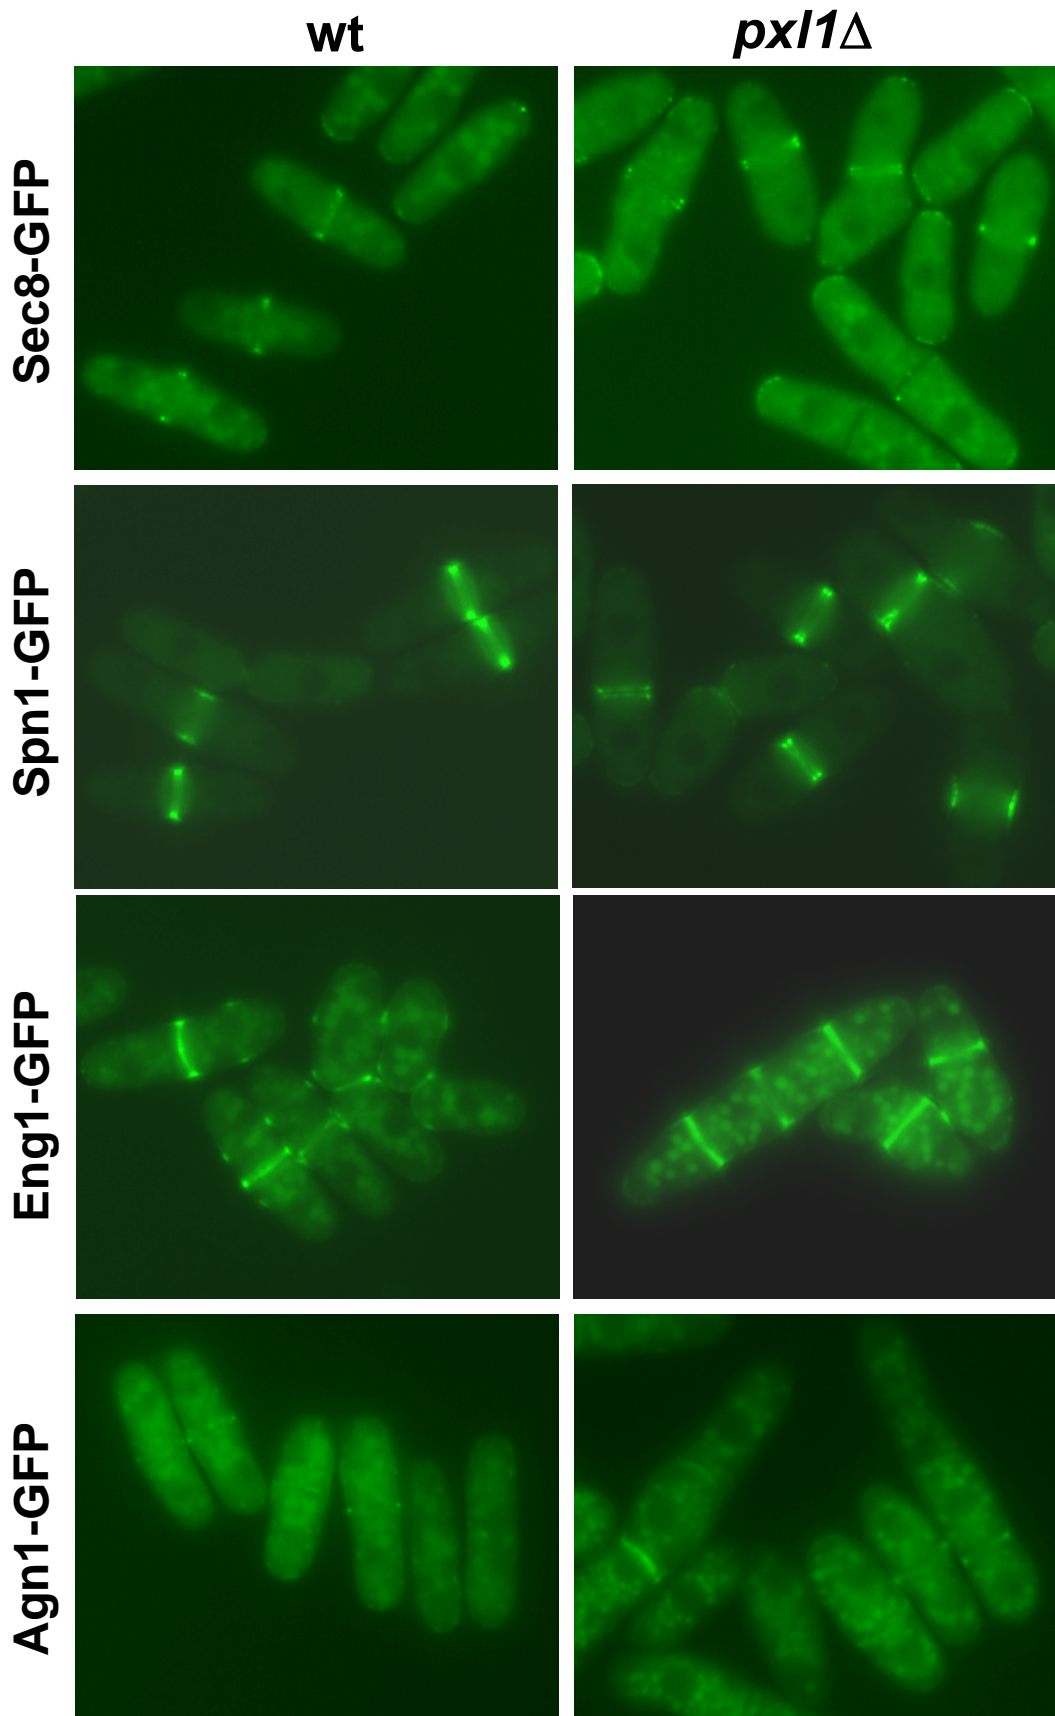

Supplementary Figure 6
